# Supplementary material for: Dependence of sperm structural and functional integrity on testicular calcineurin isoform PPP3R2 expression
Source: PubMed Central journal article supplement — J Mol Cell Biol. 2020 Jan 3;12(7):515–29. doi: 10.1093/jmcb/mjz115 (PMC7493031; doi:10.1093/jmcb/mjz115), 2020-01-03
Supplement: jmcb-2019-0200_r3_supplemental_material_mjz115.pdf [file jmcb-2019-0200_r3_supplemental_material_mjz115.pdf]

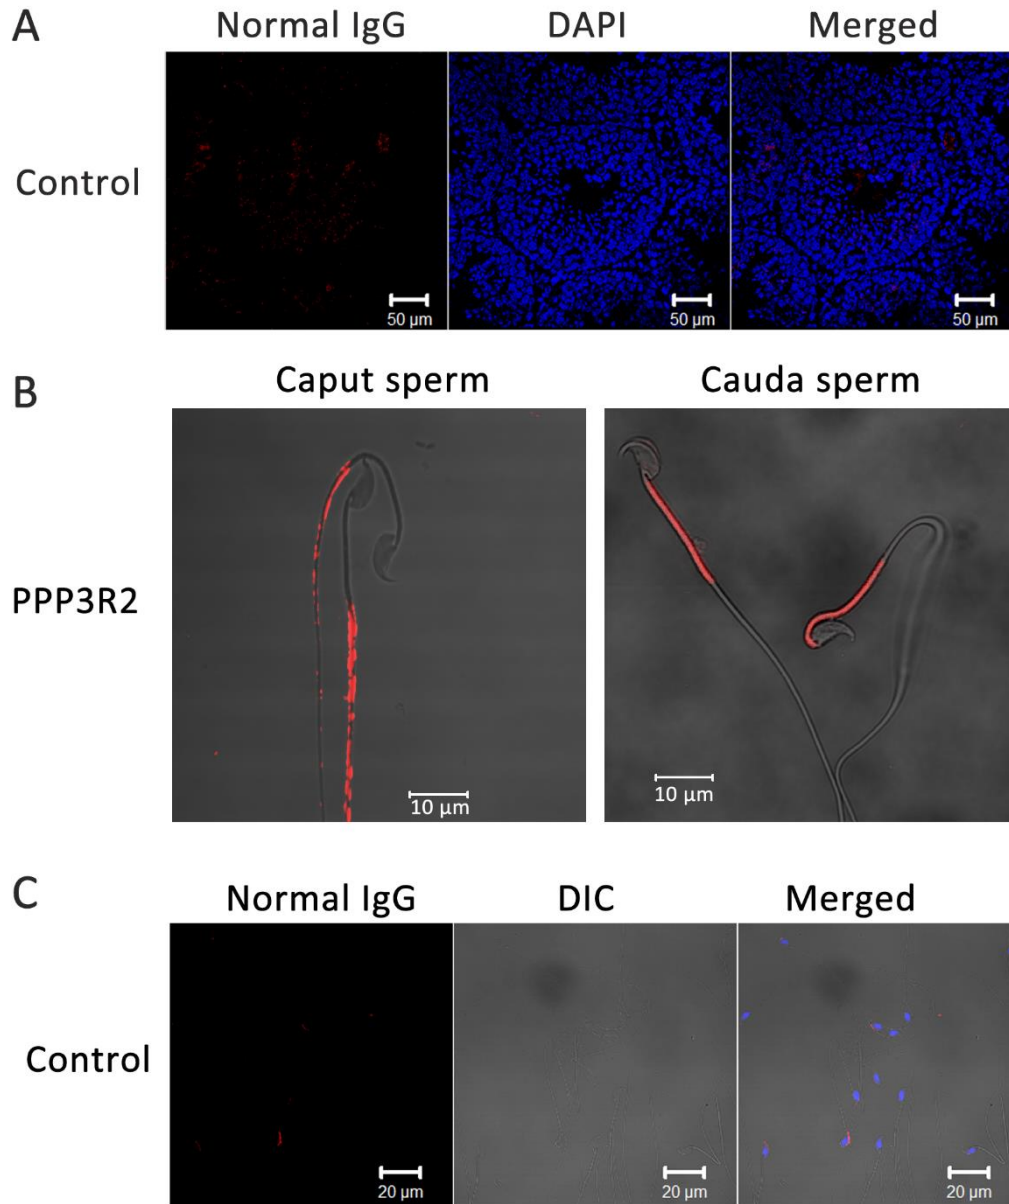

**Figure S1. Immunofluorescent staining of normal rabbit IgG (control) and PPP3R2 antibodies.** (A) Immunofluorescent staining of normal rabbit IgG (control) in mouse testis. Bars: 50 μm. (B) Immunofluorescent staining of PPP3R2 in mouse sperm from either caput epididymis or cauda epididymis. Bars: 10 μm. (C) Immunofluorescent staining of normal rabbit IgG (control) in mouse mature sperm. Bars: 20 μm.

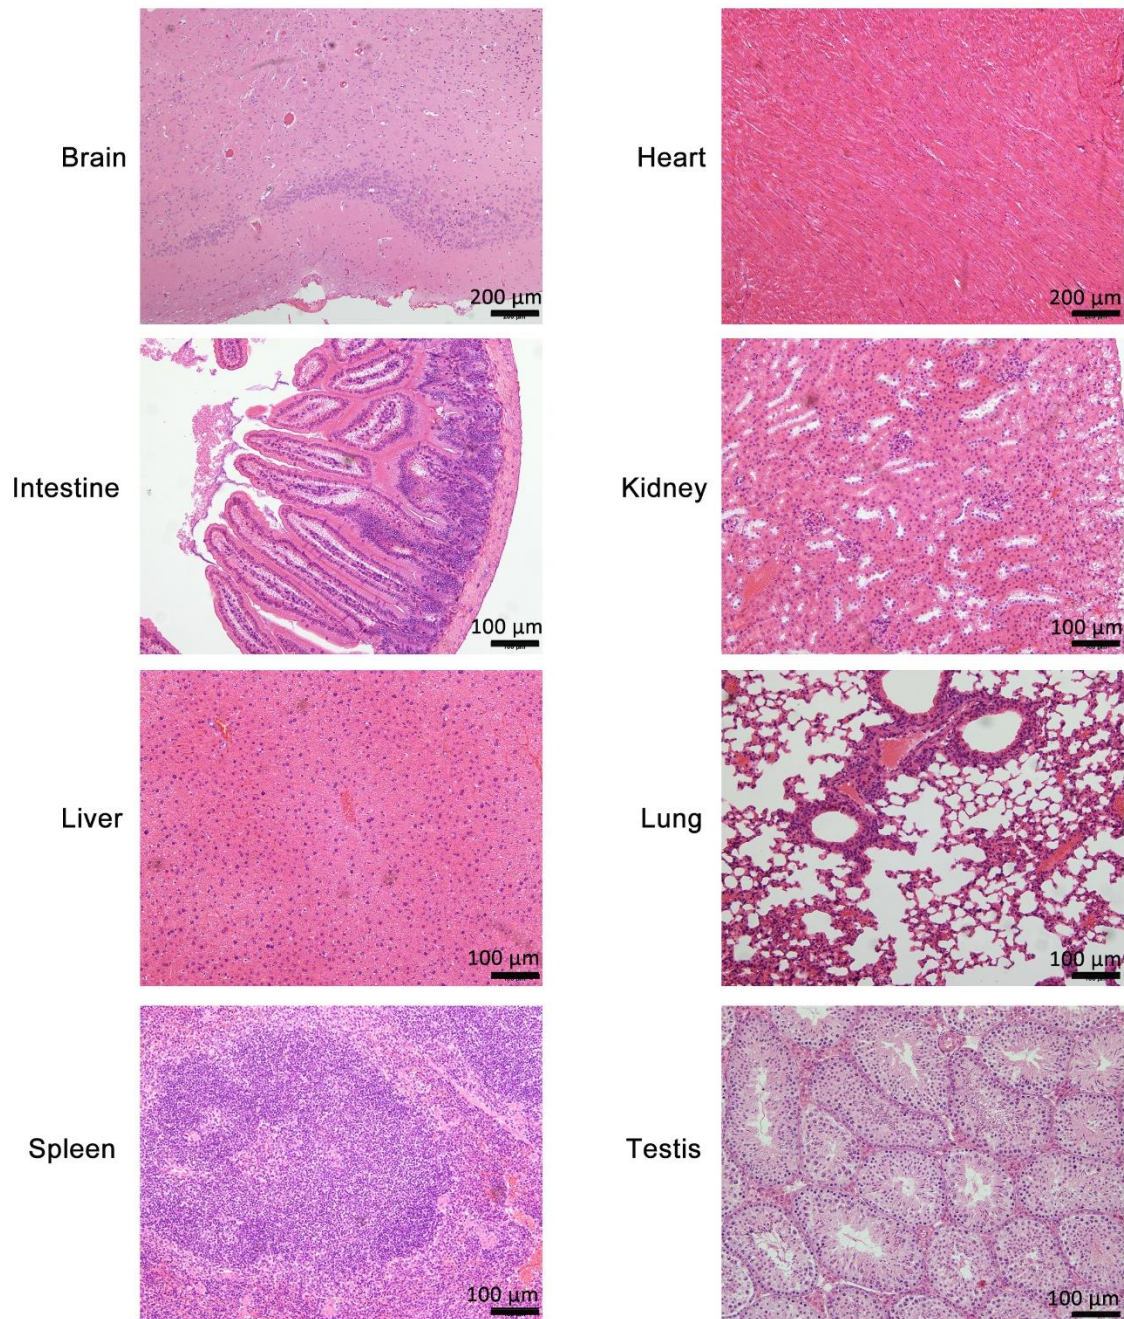

**Figure S2. Histological characteristics of *Ppp3r2* KO male mice.** H&E stained sections of brain, heart, intestine, kidney, liver, lung, spleen and testis indicate no significant changes in histological structures of organs in *Ppp3r2* KO mice (n = 3). Bars: 200 μm or 100 μm.



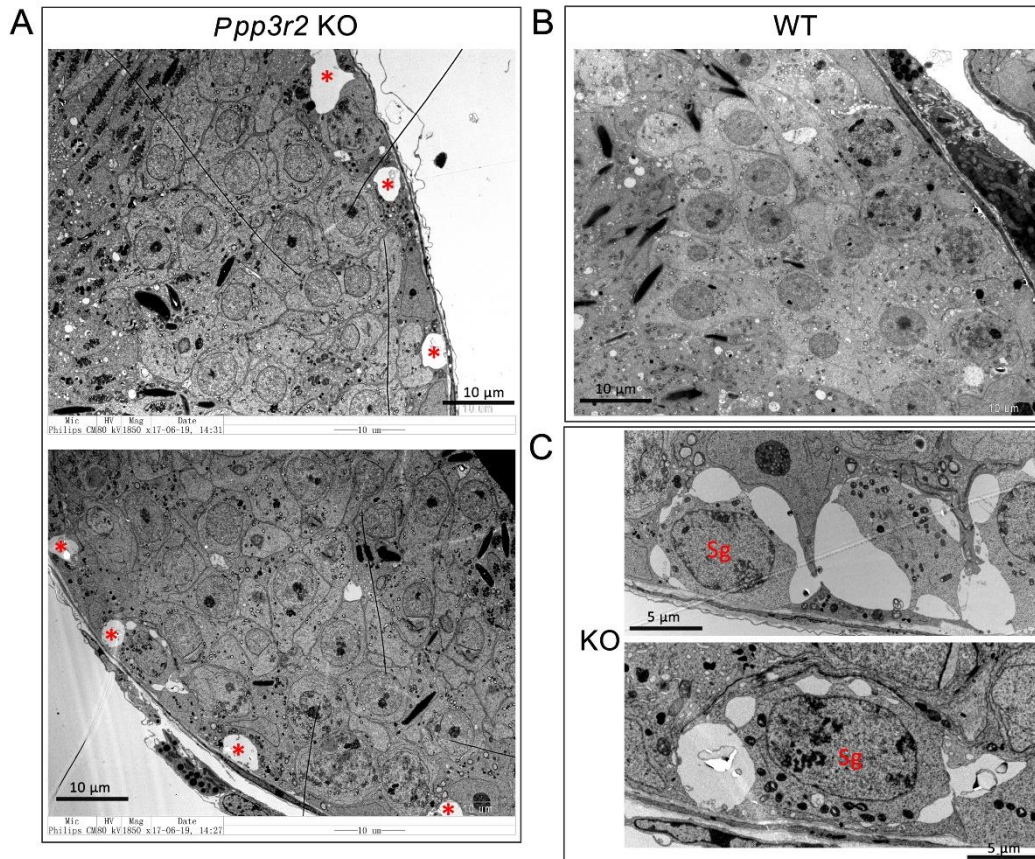

**Figure S3. Testicular ultrastructure analysis.** Transmission electron micrograph analysis of *Ppp3r2* KO (A) and WT testes (B) shows some asyntactic spermatogonia located along the basal region of the seminiferous epithelium in *Ppp3r2* KO testes (Asterisks). (C) Enlarged images show asyntactic spermatogonia (Sg) in *Ppp3r2* KO testes. Bar scales: 10 μm or 5 μm.

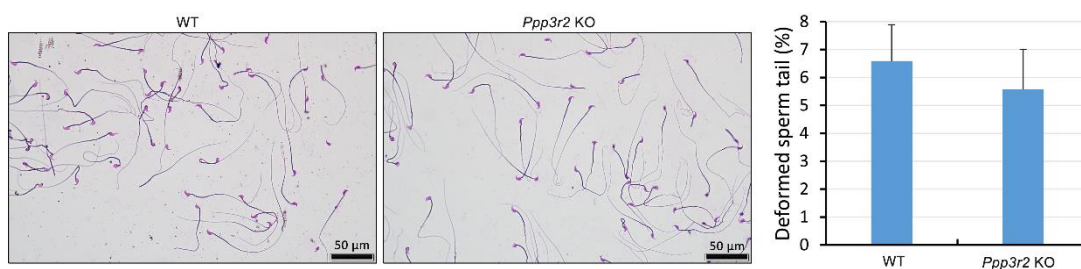

**Figure S4. Morphological analysis of caput epididymis sperm in WT and *Ppp3r2* KO mice.** In the sperm of *Ppp3r2* KO mice isolated from the caput epididymis, there is little sperm tail deformity ( $5.57 \pm 1.43\%$ ) and its appearance is similar to that in WT mice ( $6.59 \pm 1.30\%$ ) ( $n=5$ ,  $P > 0.05$ ).

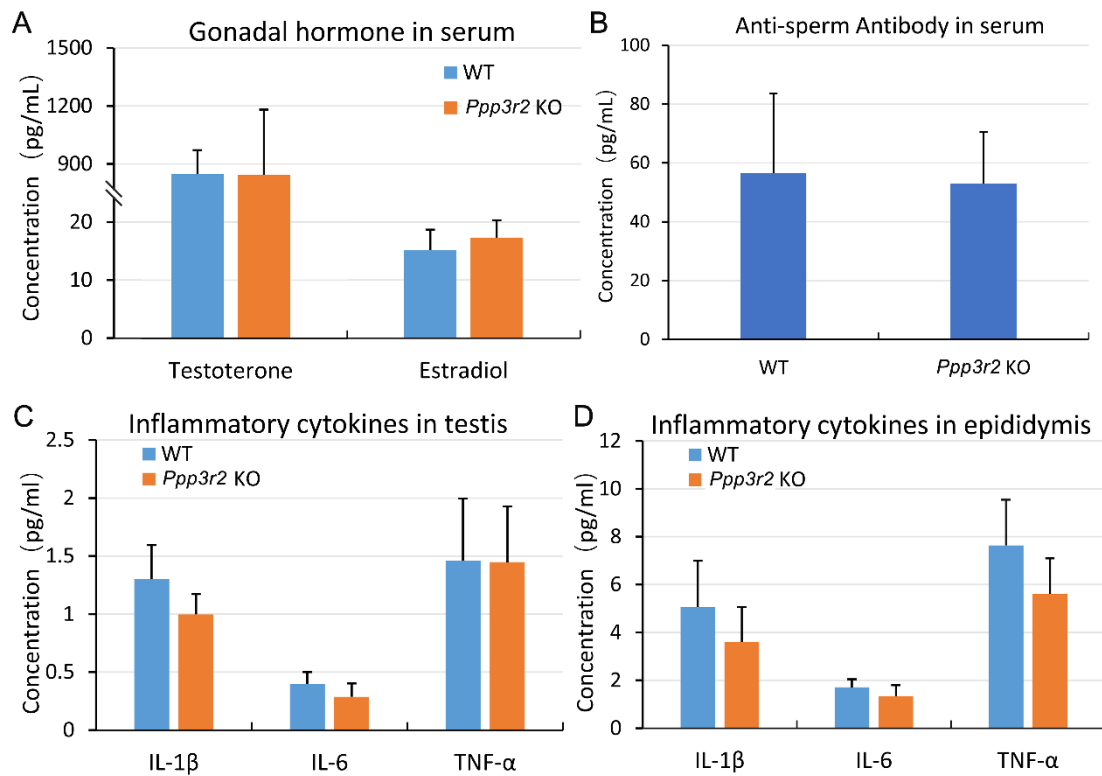

**Figure S5. Gonadal hormones, anti-sperm antibody and inflammatory cytokines analyses.** (A, B) Serum testosterone, estradiol and anti-sperm antibody detected by ELISA showed no significant differences between WT and *Ppp3r2* KO mice. (C, D) IL-1 $\beta$ , IL-6 and TNF- $\alpha$ , in testis and epididymis, detected by ELISA showed no significant differences between WT and *Ppp3r2* KO mice. Error bars represent SD (n=6).

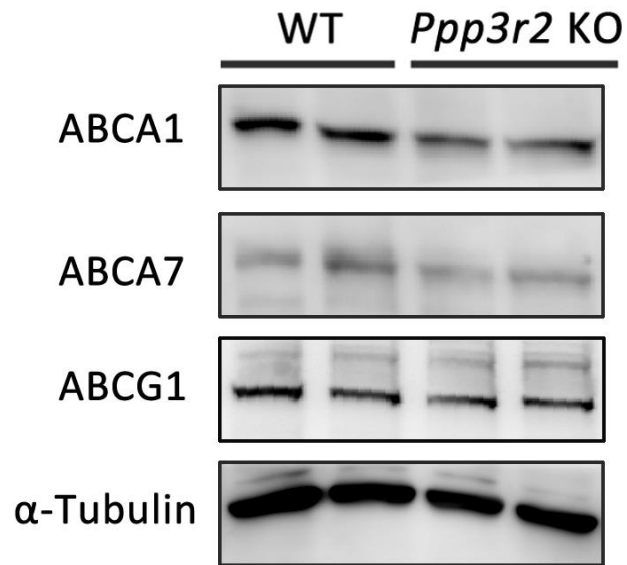

**Figure S6. Western blot analysis of cholesterol transporters in sperm.** ABCA1 and ABCG1 are significantly expressed in mature sperm, whereas the level of ABCA7 is relatively little. Moreover, ABCA1 expression in *Ppp3r2* KO sperm is greatly reduced compared with that in WT sperm, whereas ABCG1 and ABCA7 expression levels in WT sperm and *Ppp3r2* KO sperm are similar to one another.  $\alpha$ -Tubulin expression validated loading control equivalence.
